# Supplementary material for: Clearance of protein aggregates during cell division
Source: eLife journal article supplement (doi:10.7554/elife.96675), 2024-05-20

## Figure 1-figure supplement 1-source data 1

Original membranes corresponding to Figure S1C and S1D

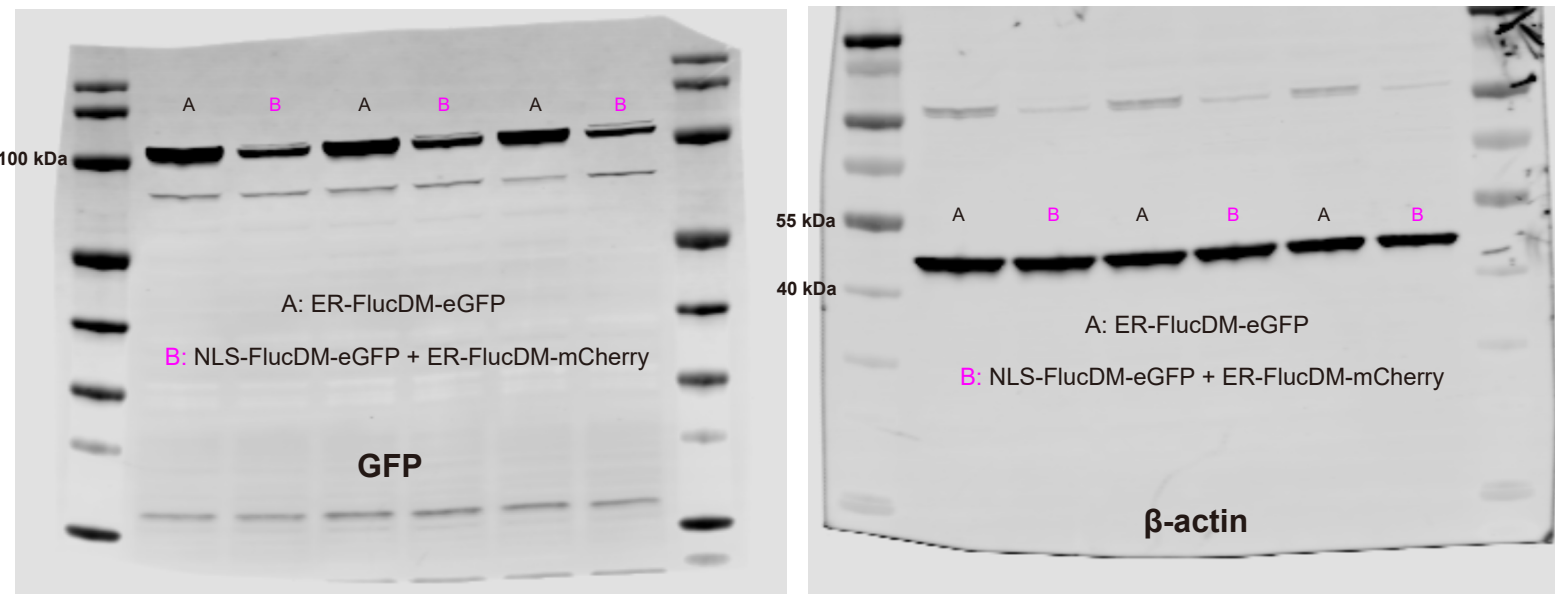

Original membranes corresponding to Figure S1G

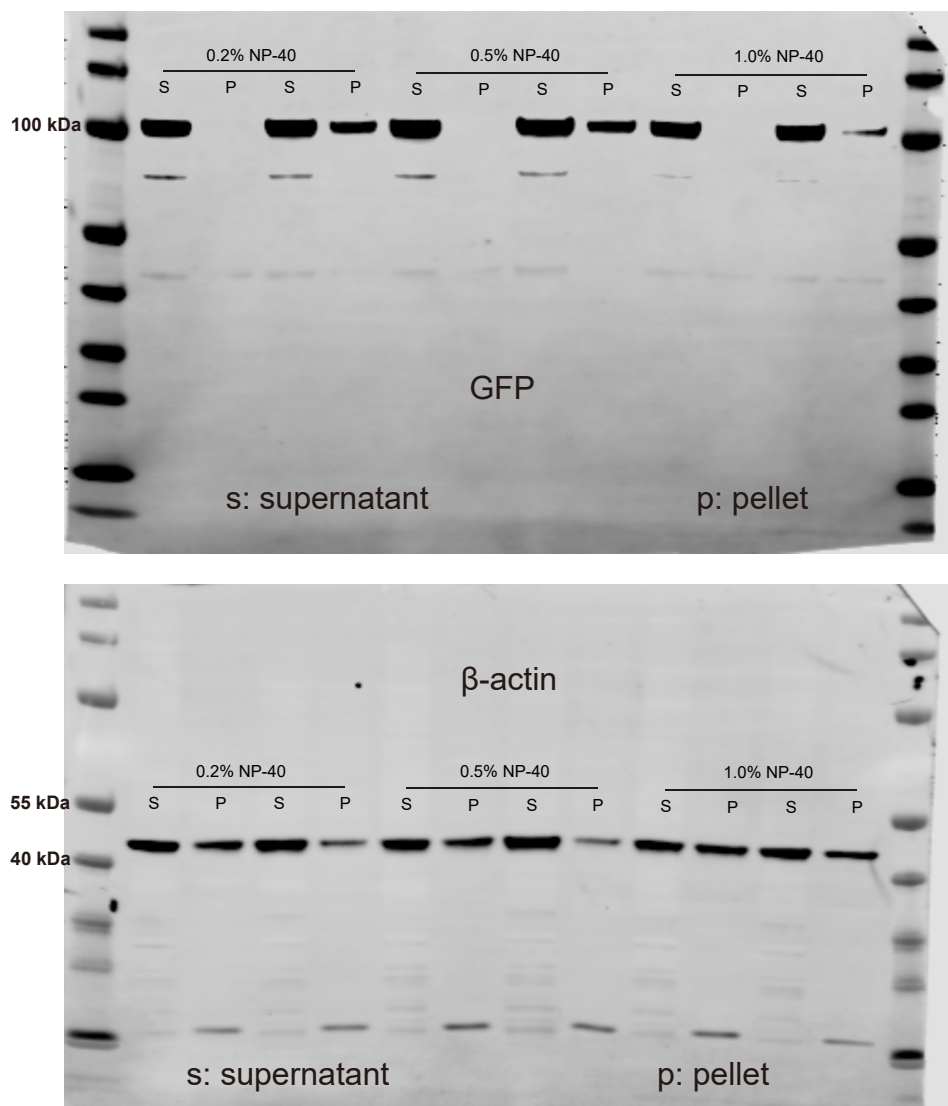

Supplement: fig1-figsupp1-data1 [file elife-96675-fig1-figsupp1-data1-v1.zip]
