# Supplementary figures and images for: Clearance of protein aggregates during cell division
Source: eLife journal article supplement (doi:10.7554/elife.96675), 2024-05-20

**Figure 1- source data 1**

**Original membranes corresponding to Figure 1C**

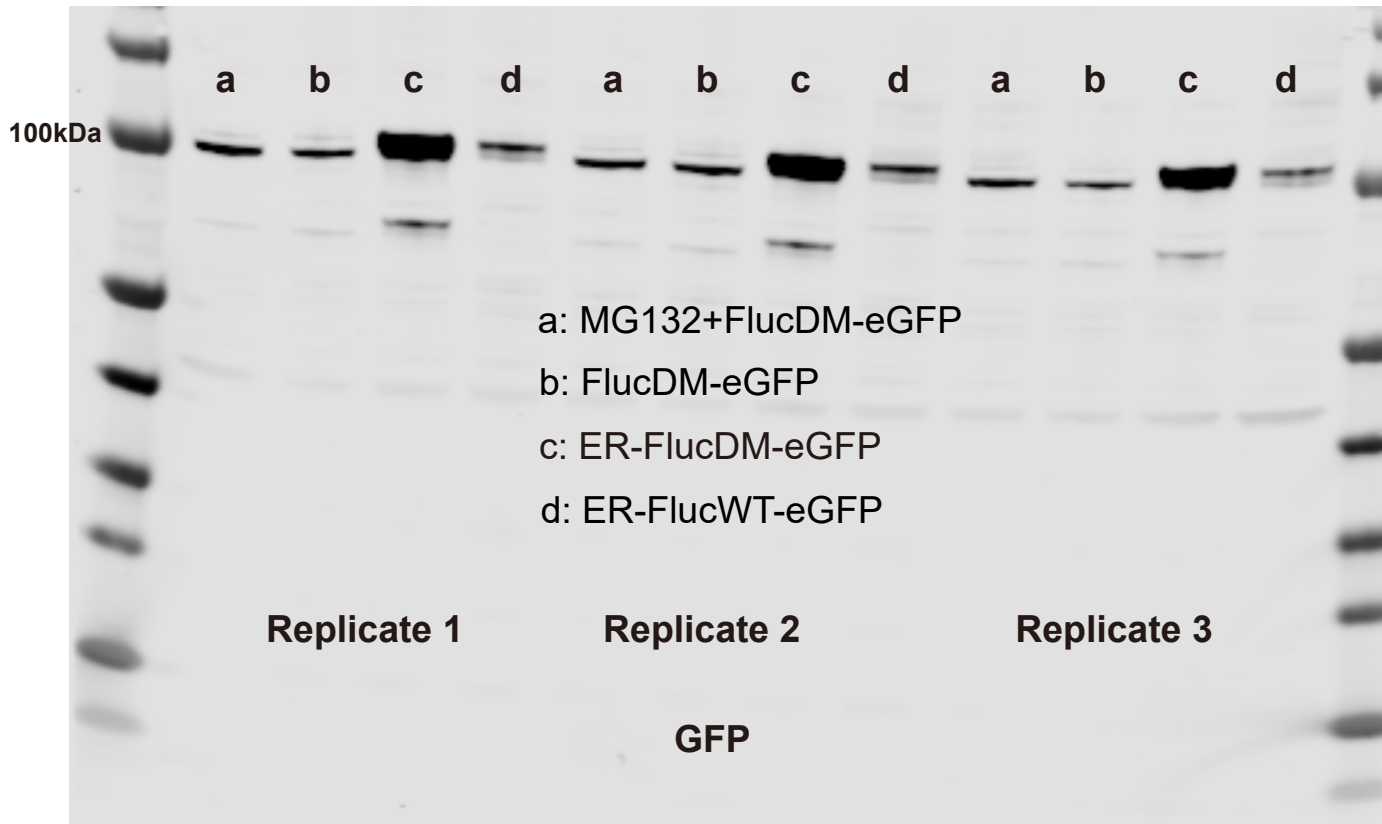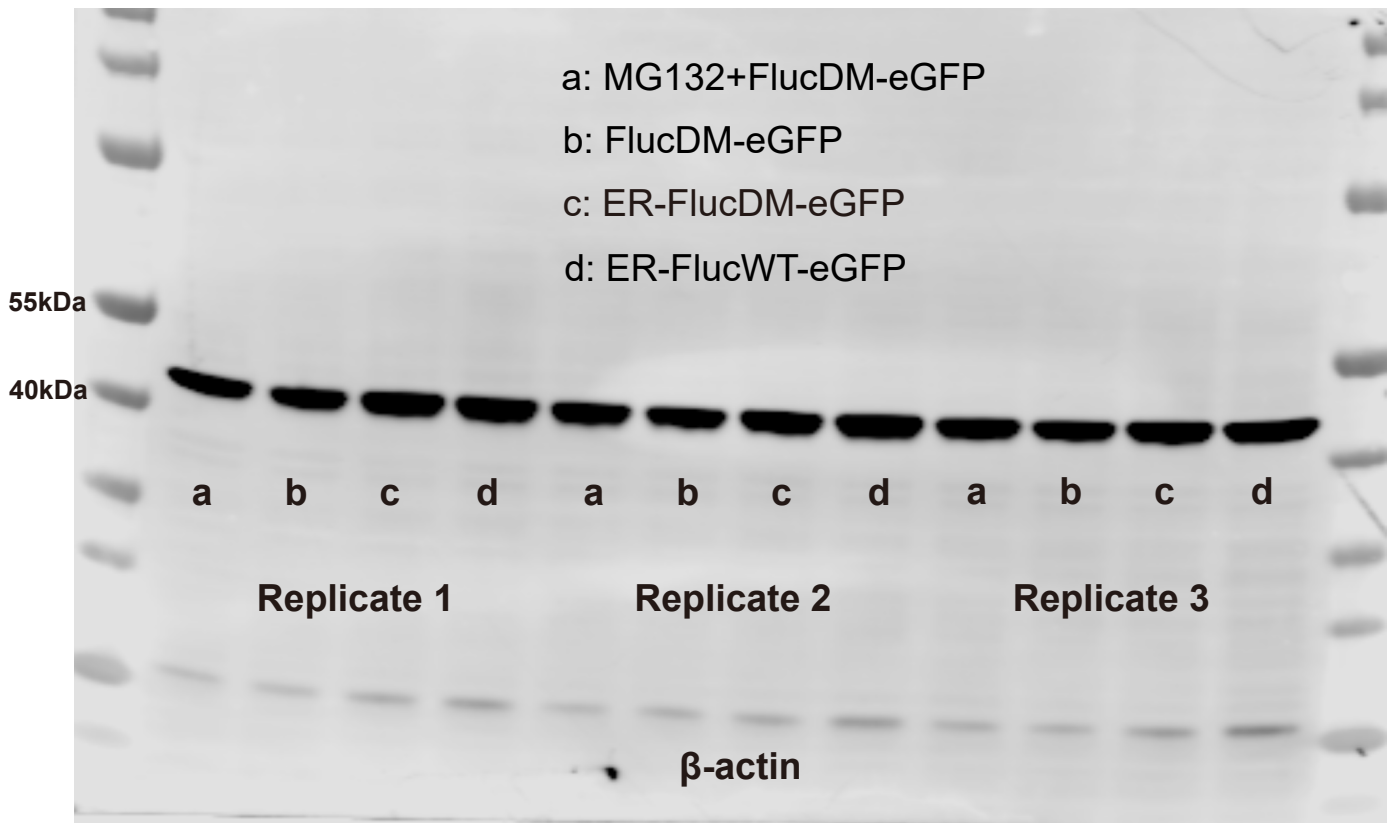

Supplement: fig1-data1 [file elife-96675-fig1-data1-v1.zip]

## Figure 7-figure supplement 1-source data 1

### Original membranes corresponding to Figure S7

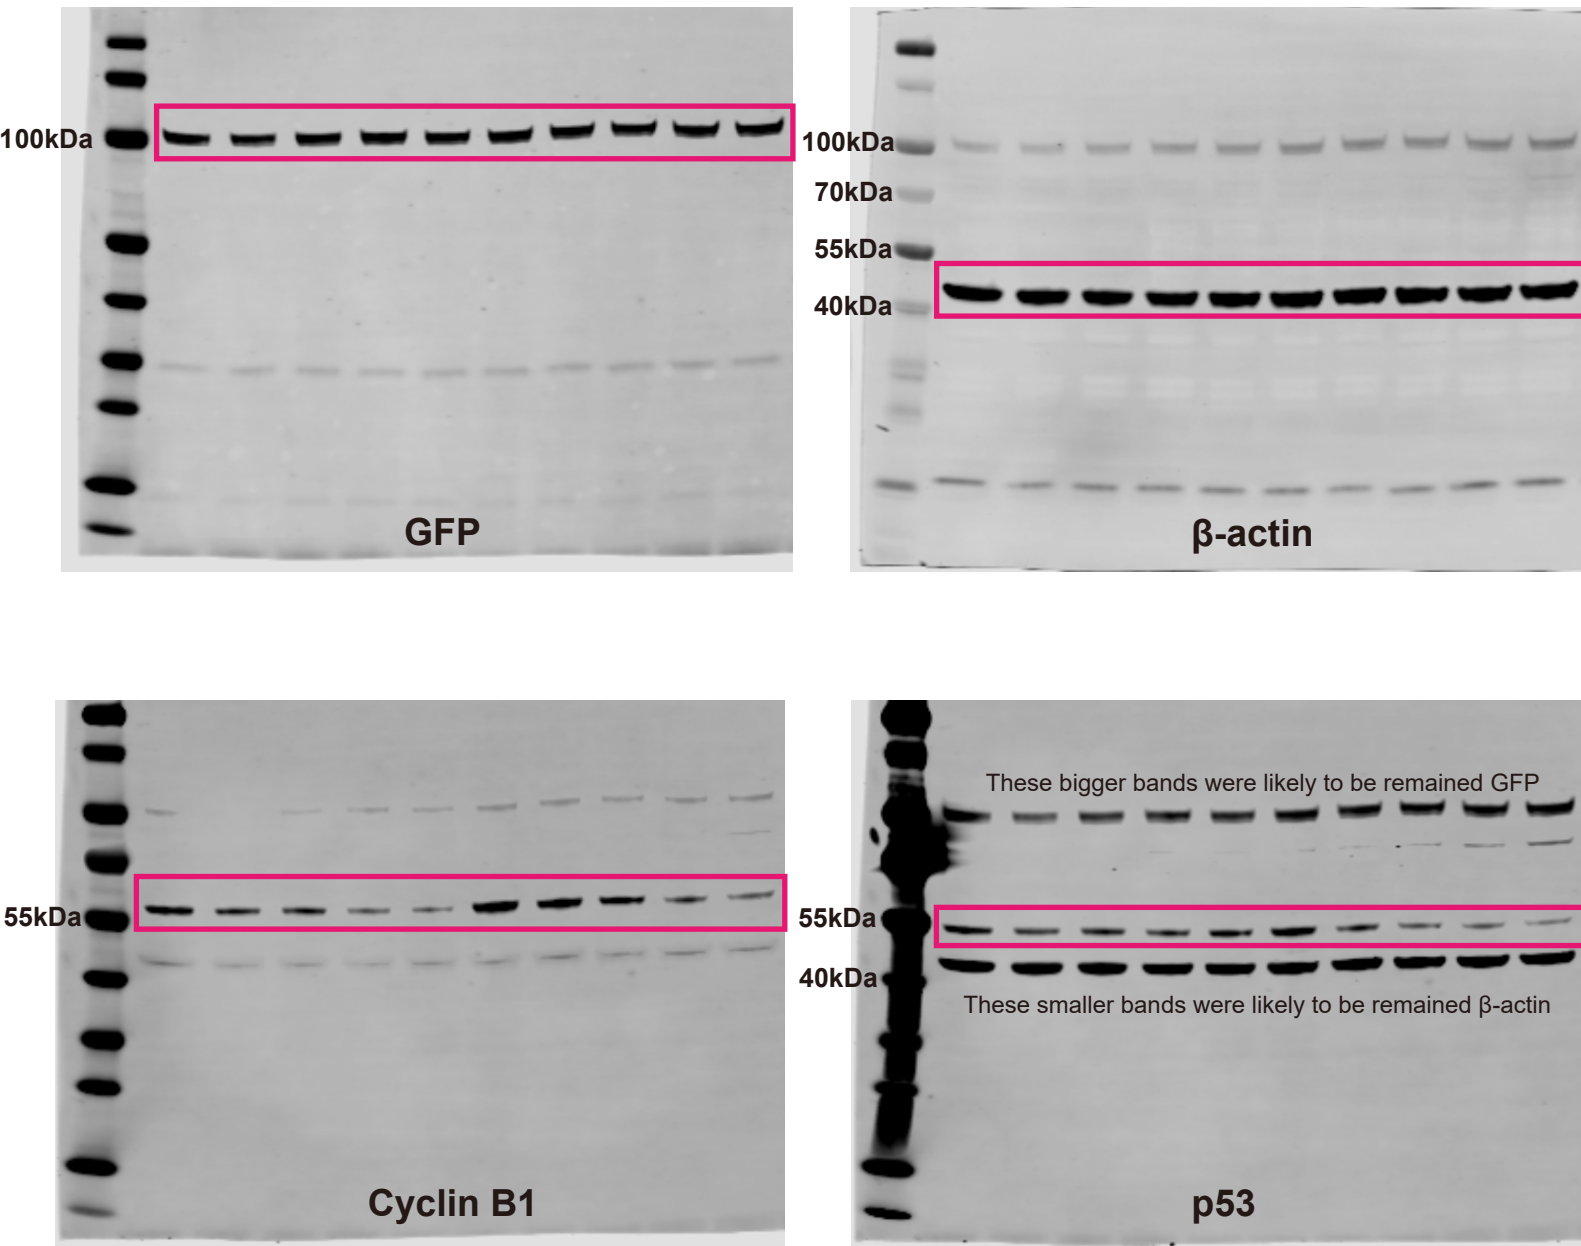

Supplement: fig6-figsupp2-data1 [file elife-96675-fig6-figsupp2-data1-v1.zip]
